# Supplementary material for: Solvothermal synthesis and modification of NaYF4:Yb/Er@NaLuF4:Yb for enhanced up-conversion luminescence for bioimaging
Source: Royal Society of Chemistry journal article supplement (doi:10.1039/c9ra08921g), 2019-01-01
Supplement: c9ra08921g1.pdf [file c9ra08921g1.pdf]

# Solvothermal synthesis and modification of NaYF<sub>4</sub>: Yb/Er@NaLuF<sub>4</sub>: Yb for enhanced up-conversion luminescence for bioimaging

Hua Li, Xuguang Liu, Xia Li\*

College of Materials Science and Engineering, Qingdao University of Science &  
Technology, Qingdao 266042, PR China.

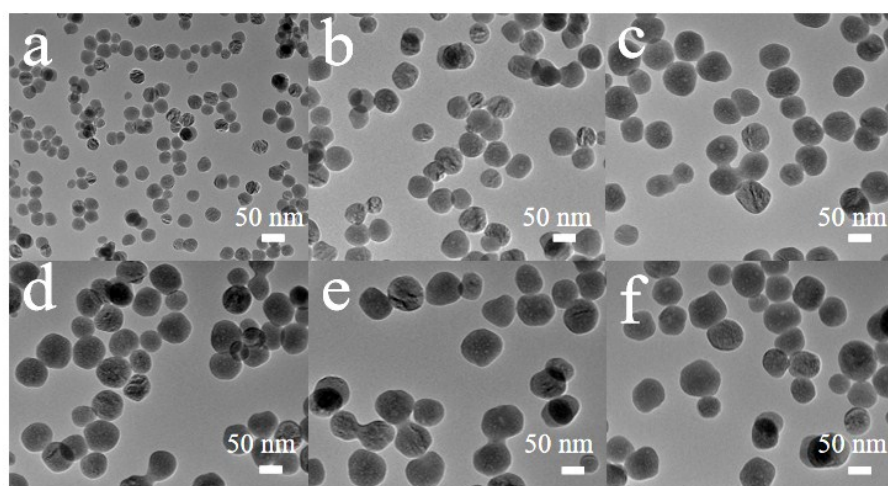

Fig. S1 TEM images of NaYF<sub>4</sub>:Yb/Er(a), NaYF<sub>4</sub>:Yb/Er@NaLuF<sub>4</sub>:Yb with reaction time of 2 h (b), 3 h (c), 4 h (d), UCNPs-OAO (e) and UCNPs-PEI (f), respectively

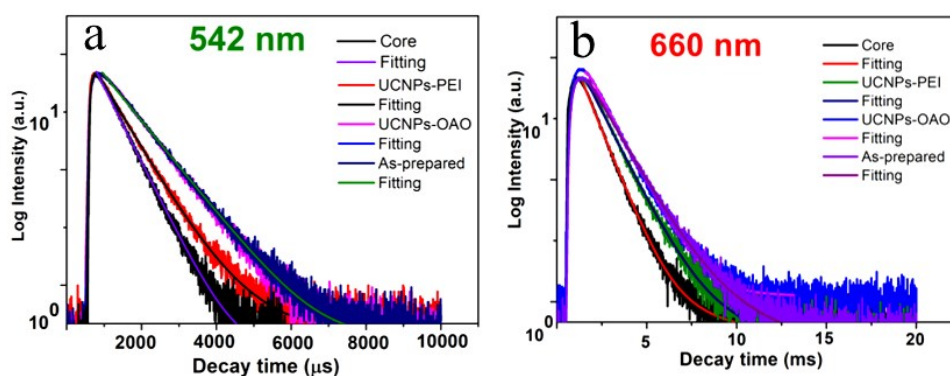

Fig. S2 The fluorescence attenuation curve of the samples at different 542 (a) and 660 (b) levels

**Table S1.** Fitting Lifetime of fluorescence attenuation Curves of  $^4S_{3/2}$  to  $^4I_{15/2}$  (542 nm) and  $^4F_{9/2}$  to  $^4I_{15/2}$  (660 nm)

|             | $^4S_{3/2}$ to $^4I_{15/2}$ (542 nm) |                |              | $^4F_{9/2}$ to $^4I_{15/2}$ (660 nm) |                |              |
|-------------|--------------------------------------|----------------|--------------|--------------------------------------|----------------|--------------|
|             | $\tau_1/\mu s$                       | $\tau_2/\mu s$ | $\tau/\mu s$ | $\tau_1/\mu s$                       | $\tau_2/\mu s$ | $\tau/\mu s$ |
| Core        | 446.8                                | 956.9          | 538.4        | 788.5                                | 4261.5         | 933.5        |
| UCNPs-PEI   | 699.3                                | 986.5          | 769.4        | 868.5                                | 2869.4         | 1120.8       |
| UCNPs-OAO   | 174.0                                | 882.5          | 923.8        | 242.2                                | 1295.5         | 1381.3       |
| As-prepared | 252.9                                | 892.6          | 968.99       | 1188.5                               | 3448.6         | 1392.2       |
